# Supplementary material
Source: PubMed Central journal article supplement (PMC6317531)
Supplement: NIHMS1001595-supplement-1.pdf [file NIHMS1001595-supplement-1.pdf]

| Filename                        | Format | Size  | Description                                                                                                                                                                                                                                                                                                                                                                                                                               |
|---------------------------------|--------|-------|-------------------------------------------------------------------------------------------------------------------------------------------------------------------------------------------------------------------------------------------------------------------------------------------------------------------------------------------------------------------------------------------------------------------------------------------|
| stem1875-sup-0001-supppfig1.eps |        | 1287K | T3 induction of KLF9 in HepG2 cells is a direct effect. (A): CHX treatment does not abrogate KLF9 responsiveness to T3. HepG2 cells were pretreated with CHX followed by treatment with T3. (B): Transfection of HepG2-TR $\beta$ cells with KLF9 siRNA resulted in 75% knockdown of TR $\beta$ relative to siRNA control and more than 50% reduction in T3 response (C): KLF9 mRNA levels were assessed as in Figure 1 of the main text. |
| stem1875-sup-0002-supppfig2.eps |        | 3968K | KLF9 is not expressed in cholangiocytes, as judged by absence of colocalization of KLF9 with cholangiocytes marker CK19.                                                                                                                                                                                                                                                                                                                  |
| stem1875-sup-0003-supppfig3.eps |        | 783K  | (A): HepG2-TR $\beta$ cells were transfected with KLF9 siRNA at 50 nM final concentration. RNA and protein were prepared for qPCR, and Western blots, respectively. (B): Three days after KLF9 knockdown, cells were treated with 100 nM T3 for 18 h, and KLF9 mRNA was measured by qPCR. All data are represented as mean $\mu$ SD.                                                                                                      |
| stem1875-sup-0004-supppfig4.eps |        | 842K  | Venn diagram of genes regulated by KLF9 or T3 (TR). Diagrams represent the number of genes regulated after KLF9 knockdown or treatment with T3 in HepG2-TR $\beta$ cells. The number in the middle (overlap) represents the genes commonly regulated by KLF9 and T3. Microarray data are deposited in the Gene Expression Omnibus (GEO); accession number GSE54699;                                                                       |
| stem1875-sup-0005-supppfig5.eps |        | 1107K | Effect of KLF9 knockdown on T3 response appears false-negative on ALPI in microarray analysis. Basal expression level of ALPI mRNA is significantly decreased after KLF9 knockdown but magnitude of gene response to T3 is the same. mRNA levels were assessed as in Figure 1.                                                                                                                                                            |
| stem1875-sup-0006-supppfig6.eps |        | 1070K | TR $\alpha$ and TR $\beta$ mRNA expression levels in different cell types and during different stages of differentiation were measured by qPCR. All data are represented as mean $\mu$ SD.                                                                                                                                                                                                                                                |
| stem1875-sup-0007-supppfig7.eps |        | 4185K | iKCL004, iKCL011 and KCL034 were differentiated to endoderm. During definitive endoderm differentiation qRT-PCR analysis revealed decrease of pluripotent markers Nanog and Oct4 and emergence of endoderm markers MIXL1 and SOX17 (A). GATA4+ immunostaining confirmed differentiation of the majority of cells into endoderm (B).                                                                                                       |
| stem1875-sup-0008-supppfig8.eps |        | 921K  | qPCR verification of Notch pathway genes LFNG and DLK1, identified as T3 targets in KCL034 and iKCL004 cells. All data are represented as mean $\mu$ SD.                                                                                                                                                                                                                                                                                  |
| stem1875-sup-0009-supppfig9.eps |        | 1452K | Model of TR/KLF9 regulation of Notch pathway. TR and KLF9 cooperate to regulate multiple branches of the Notch pathway. A schematic of the Notch signaling pathway is presented with TR or/and KLF9 targets marked in orange.                                                                                                                                                                                                             |

**A**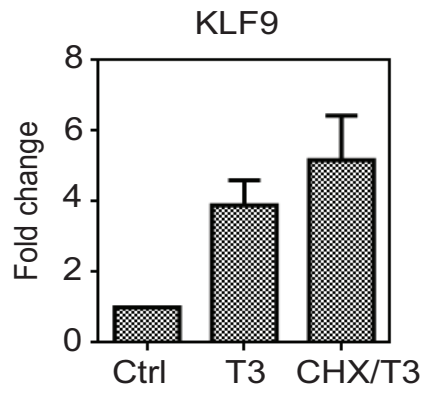**B**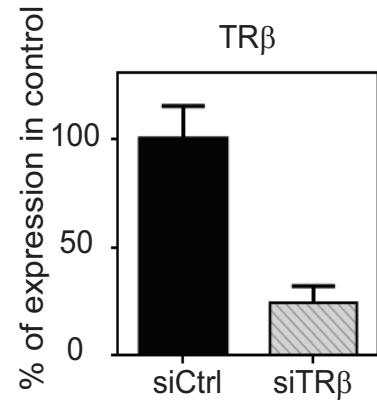**C**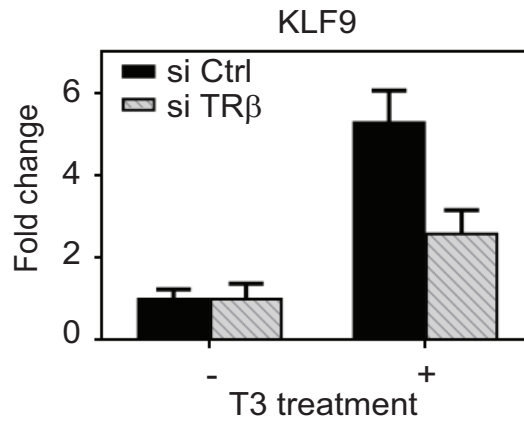

KLF9/CK19 expression in mouse liver

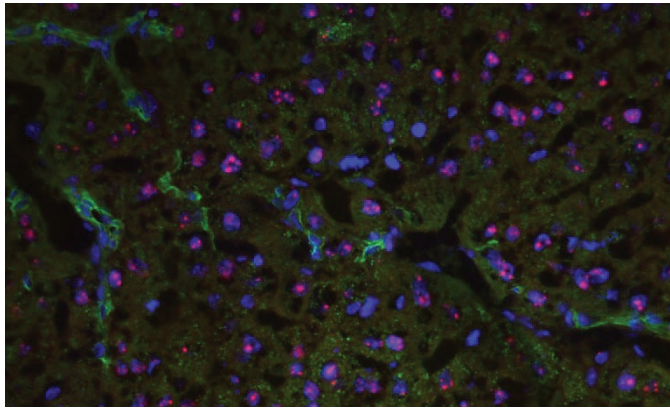

KLF9 (red)  
CK19 (green)

Supplemental Figure 2, Webb P.

**A**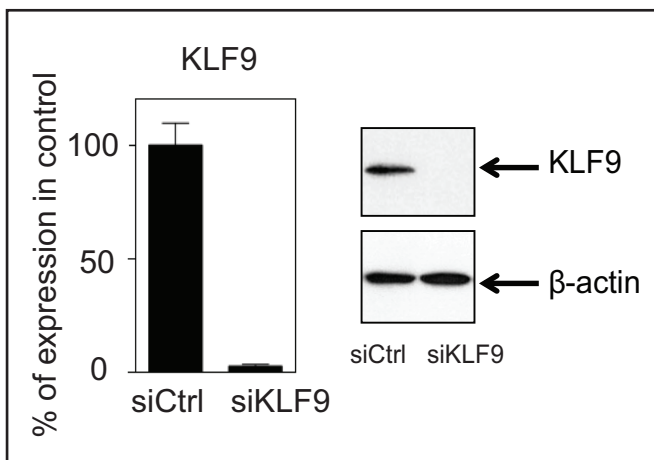**B**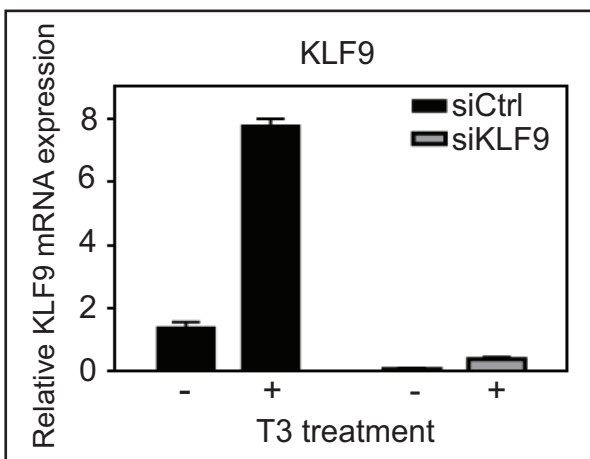

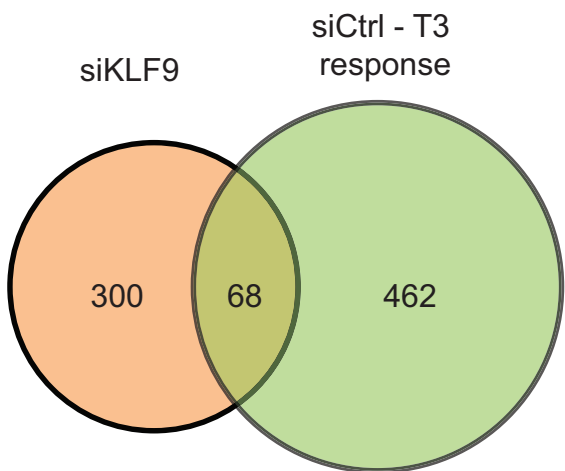

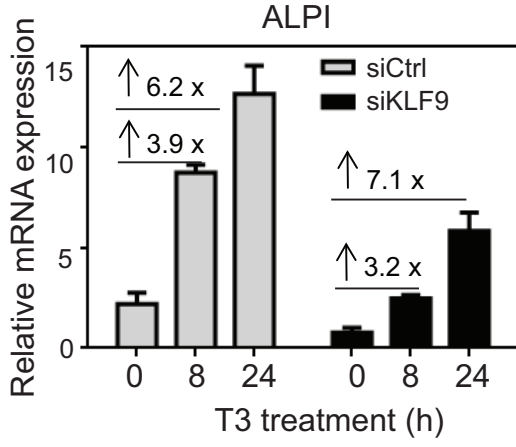

Supplemental Figure 5, Webb P.

# TRs

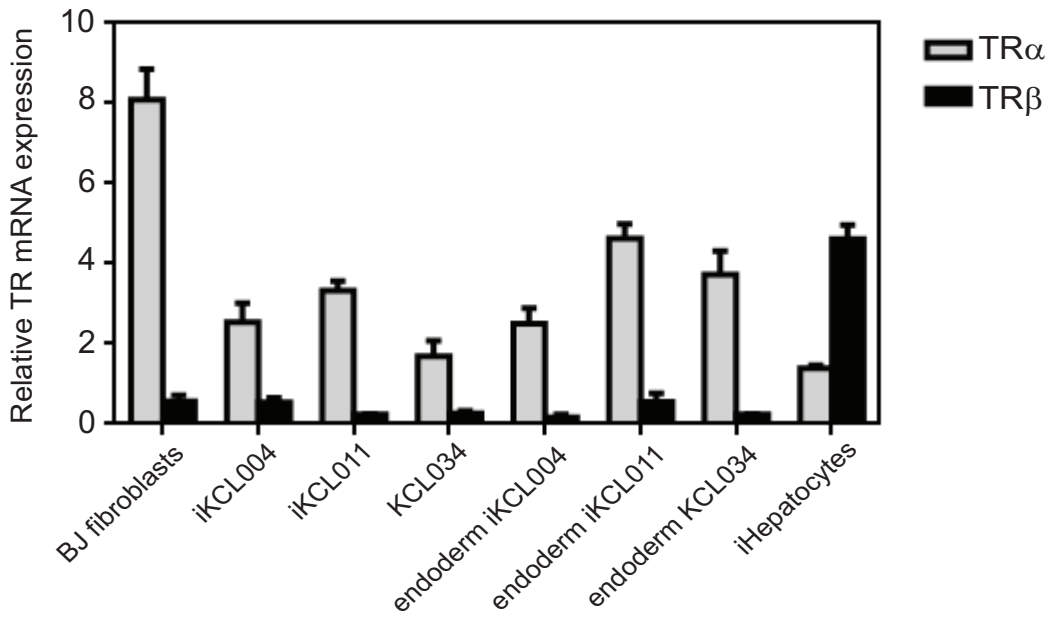

A

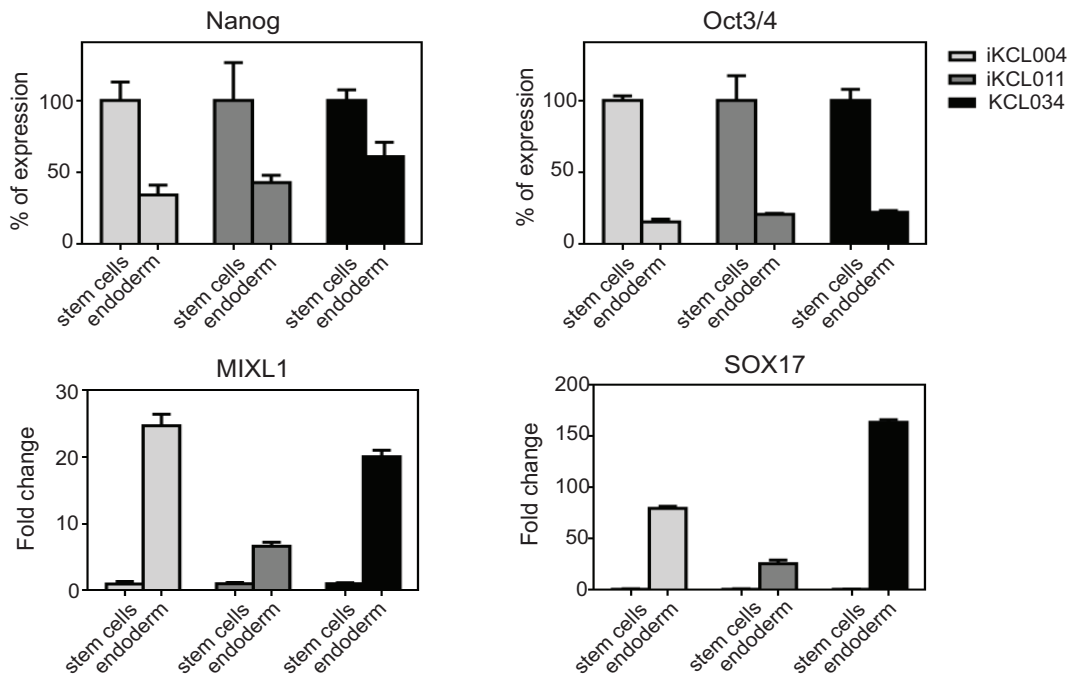

B

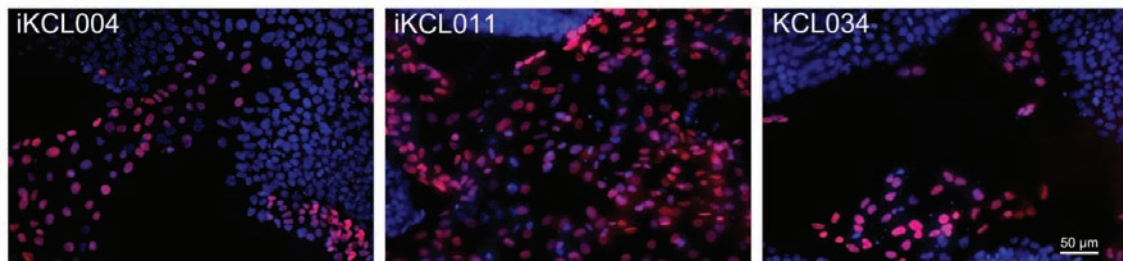



### DLK1

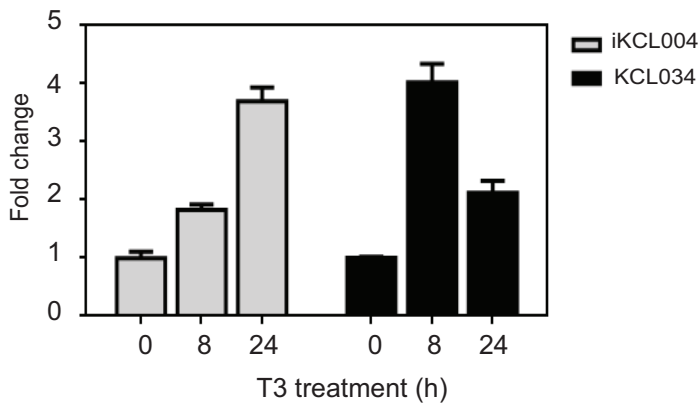

### LFNG

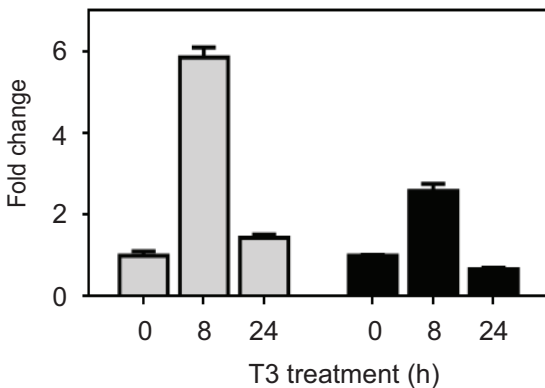

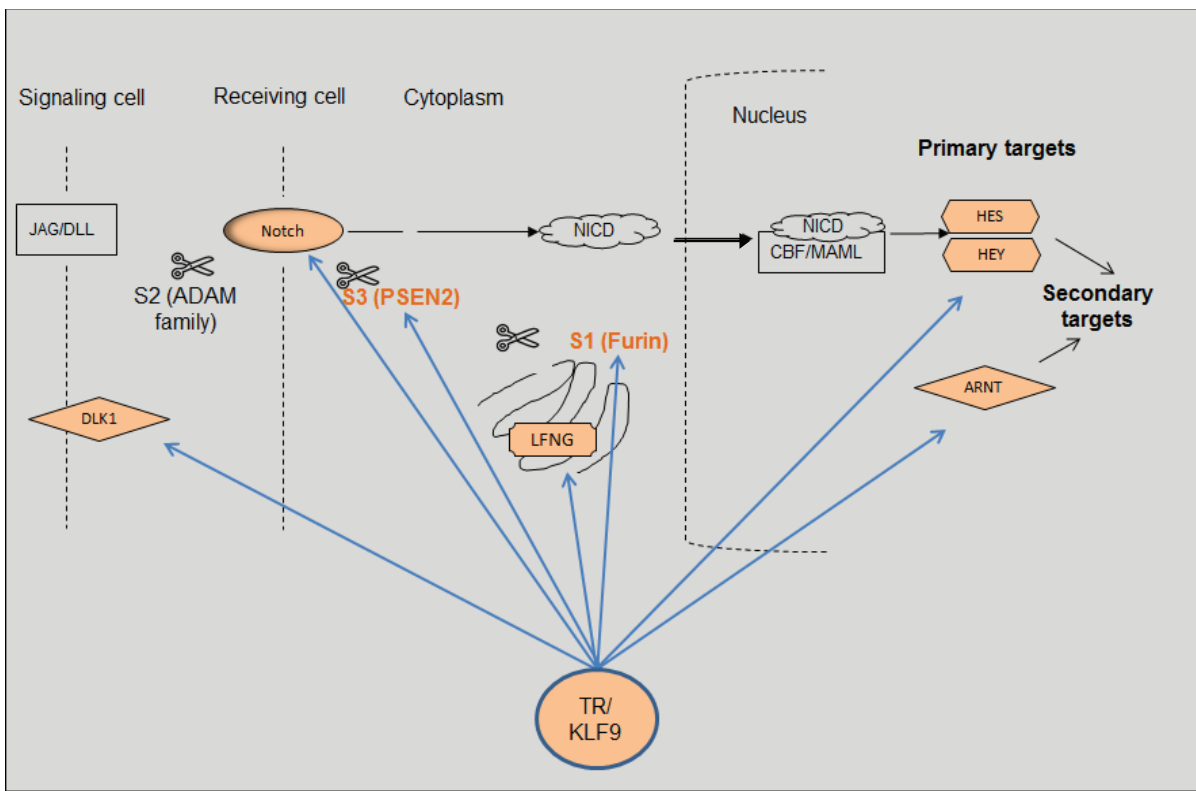

Supplemental Figure 9, Webb P.

Supplemental Table 1. Summary of genes regulated by T3 in control and KLF9-silenced HepG2-TR $\beta$  cells. Microarray data are deposited in the Gene Expression Omnibus (GEO); <http://www.ncbi.nlm.nih.gov/geo/query/acc.cgi?token=sxkvckgwhxmfmgx&acc=GSE54699>; accession number GSE54699).

| HepG2-TR $\beta$ | Treatment | Regulated genes |
|------------------|-----------|-----------------|
| siControl        | T3 8 h    | 295             |
|                  | T3 24 h   | 468             |
|                  | T3 total  | <b>530</b>      |
| siKLF9           | T3 8 h    | 355             |
|                  | T3 24 h   | 448             |
|                  | T3 total  | <b>576</b>      |

Supplemental Table 2. KLF9 mediated processes. Canonical processes obtained from GeneCodis using SlimProcess database. Gene co-occurrence annotation found by Genecodis for the genes differentially expressed ( $FC > 2$ ,  $P < 0.05$  corrected for multiple testing) between siCtrl versus siKLF9 HepG2-TR $\beta$  samples.  $P$ -values have been obtained through hypergeometric analysis (Hyp) corrected by FDR method (Hyp\*).

| NGR  | NG | Hyp       | Hyp*      | Annotations                                                   |
|------|----|-----------|-----------|---------------------------------------------------------------|
| 1176 | 28 | 3.18E-06  | 4.45E-05  | GO:0007165: signal transduction (BP)                          |
| 556  | 17 | 1.36E-05  | 9.51E-05  | GO:0007155: cell adhesion (BP)                                |
| 114  | 7  | 7.94E-05  | 0.0003704 | GO:0007568: aging (BP)                                        |
| 519  | 13 | 0.0009204 | 0.0025772 | GO:0030154: cell differentiation (BP)                         |
| 156  | 6  | 0.0029387 | 0.0068569 | GO:0008219: cell death (BP)                                   |
| 630  | 13 | 0.0048978 | 0.0097956 | GO:0055085: transmembrane transport (BP)                      |
| 242  | 7  | 0.0064812 | 0.0113423 | GO:0007267: cell-cell signaling (BP)                          |
| 182  | 5  | 0.0245919 | 0.038254  | GO:0006457: protein folding (BP)                              |
| 200  | 5  | 0.0348663 | 0.0488129 | GO:0034641: cellular nitrogen compound metabolic process (BP) |

NGR=Number of annotated genes in the reference list  
 NG= Number of annotated genes in the input list  
 Hyp=Hypergeometric pValue  
 Hyp\*= Corrected hypergeometric pValue

Supplemental Table 3. Differentially expressed genes in the KLF9 pathways obtained from GeneCodis using Panther pathways database (Table 1, upper section)

| <b>Annotations (Panther Pathways)</b>                                            | <b>Gene Symbol</b>                               |
|----------------------------------------------------------------------------------|--------------------------------------------------|
| <b>P00052: TGF-beta signaling pathway</b>                                        | FOSL1,GDF11,SMAD7,BMP6,FKBP1A,INHBE,JUN          |
| <b>P00003: Alzheimer disease-amyloid secretase pathway</b>                       | CACNB2,PRKCE,PRKCZ,BACE2,PSEN2                   |
| <b>P00021: FGF signaling pathway</b>                                             | SPRY4,PRKCE,PRKCZ,FGF6,PPP2R1B                   |
| <b>P00057: Wnt signaling pathway</b>                                             | DKK1,WNT11,PRKCE,PRKCZ,EDN1,KREMEN2,CDH15,ADSSL1 |
| <b>P00006: Apoptosis signaling pathway</b>                                       | PRKCE,DIABLO,BIRC3,JUN,RELB                      |
| <b>P00031: Inflammation mediated by chemokine and cytokine signaling pathway</b> | CCL2,PRKCE,PRKCZ,CCL5,IL8,JUN                    |

Supplemental Table 4. Differentially expressed genes in the KLF9-mediated processes obtained from GeneCodis using SlimProcess database (Supplemental Table 2).

| <b>Annotations</b>                                                   | <b>Gene Symbol</b>                                                                                                                                                       |
|----------------------------------------------------------------------|--------------------------------------------------------------------------------------------------------------------------------------------------------------------------|
| <b>GO:0007165: signal transduction (BP)</b>                          | IL7R,WNT11,RARB,CLIC3,SLC44A2,OCRL,COL15A1,IGF1,TNFRSF21,NR2E3,ABL2,BAIAP2L2,TNFAIP6,IL8,FKBP1A,PRKCE,CHL1,FGF6,CCL2,HMOX1,PRKCZ,MDK,DKK1,ULK1,ARHGAP28,NEDD9,PLAU,RERGL |
| <b>GO:0007155: cell adhesion (BP)</b>                                | CLDN1,TNFRSF12A,DSC2,F11R,F8,COL15A1,CDH15,THBS1,TNFAIP6,MYBPC2,CHL1,CCL2,HES1,EPHA2,COL9A1,NEDD9,OLR1                                                                   |
| <b>GO:0007568: aging (BP)</b>                                        | ALDOC,IL6,DCN,CCL2,JUN,CCL5,SERPINF1                                                                                                                                     |
| <b>GO:0030154: cell differentiation (BP)</b>                         | ANG,TNFRSF12A,ARNT,SEMA4B,COL15A1,SLIT2,DUSP6,CHL1,FGF6,MDK,ZSCAN2,SEMA4F,FOXO4                                                                                          |
| <b>GO:0008219: cell death (BP)</b>                                   | ANG,TNFRSF12A,HYAL1,HMOX1,PSEN2,OLR1                                                                                                                                     |
| <b>GO:0055085: transmembrane transport (BP)</b>                      | SLC2A12,ATP2B4,SLC44A2,CACNA1H,SLC22A3,SLC25A42,ATP6V1G2,SLC16A14,HMOX1,KCNU1,CLCNKA,SLC39A7,SLC22A18                                                                    |
| <b>GO:0007267: cell-cell signaling (BP)</b>                          | EDN1,IL11,NFE2,TNFAIP6,FGF6,CCL5,SEMA4F                                                                                                                                  |
| <b>GO:0006457: protein folding (BP)</b>                              | TUBB2B,FKBP1A,TUBB4,DNAJC4,DNAJB6                                                                                                                                        |
| <b>GO:0034641: cellular nitrogen compound metabolic process (BP)</b> | ARG2,TMLHE,QDPR,GPT,HPD                                                                                                                                                  |

Supplemental Table 5. T3 mediated pathways and processes. Canonical pathways and processes obtained from GeneCodis using Panther pathways and SlimProsses database, respectively. Gene co-occurrence annotation found by GeneCodis for the genes differentially expressed ( $FC > 2$ ,  $P < 0.05$  corrected for multiple testing) between Ctrl versus T3-treated HepG2-TR $\beta$  samples.  $P$ -values have been obtained through hypergeometric analysis (Hyp) corrected by FDR method (Hyp\*).

### T3 targeted pathways

| NGR | NG | Hyp        | Hyp*       | Annotations (Panther Pathways)                                     |
|-----|----|------------|------------|--------------------------------------------------------------------|
| 96  | 9  | 6.92E-06   | 9.00E-05   | P00036: Interleukin signaling pathway                              |
| 66  | 5  | 0.00209362 | 0.00544341 | P00003: Alzheimer disease-amyloid secretase pathway                |
| 72  | 5  | 0.00306684 | 0.00569556 | P00019: Endothelin signaling pathway                               |
| 126 | 7  | 0.00177089 | 0.0057554  | P00029: Huntington disease                                         |
| 70  | 5  | 0.00271231 | 0.00587668 | P00016: Cytoskeletal regulation by Rho GTPase                      |
| 108 | 6  | 0.00372057 | 0.00604593 | P00027: Heterotrimeric G-protein signaling pathway-Gq alpha and Go |
| 280 | 11 | 0.00175866 | 0.00762087 | P00057: Wnt signaling pathway                                      |
| 153 | 8  | 0.00125551 | 0.0081608  | P00005: Angiogenesis                                               |
| 198 | 8  | 0.00609162 | 0.008799   | P00031: Inflammation mediated by chemokine and cytokine signaling  |
| 150 | 6  | 0.0173269  | 0.0204772  | P00026: Heterotrimeric G-protein signaling pathway-Gi alpha and Gs |
| 107 | 5  | 0.0158559  | 0.0206127  | P00006: Apoptosis signaling pathway                                |
| 114 | 5  | 0.0202859  | 0.0219764  | P00018: EGF receptor signaling pathway                             |
| 118 | 5  | 0.0231471  | 0.0231471  | P00004: Alzheimer disease-presenilin pathway                       |

### T3 targeted processes

| NGR  | NG | Hyp      | Hyp*     | Annotations                                                   |
|------|----|----------|----------|---------------------------------------------------------------|
| 1176 | 53 | 3.29E-14 | 5.93E-13 | GO:0007165: signal transduction (BP)                          |
| 242  | 21 | 2.54E-11 | 2.28E-10 | GO:0007267: cell-cell signaling (BP)                          |
| 519  | 23 | 9.90E-07 | 5.94E-06 | GO:0030154: cell differentiation (BP)                         |
| 200  | 10 | 0.000459 | 0.001376 | GO:0034641: cellular nitrogen compound metabolic process (BP) |
| 128  | 8  | 0.00039  | 0.001403 | GO:0009790: embryo development (BP)                           |
| 556  | 18 | 0.000731 | 0.00188  | GO:0007155: cell adhesion (BP)                                |
| 114  | 7  | 0.000992 | 0.002231 | GO:0007568: aging (BP)                                        |
| 604  | 18 | 0.001835 | 0.003669 | GO:0006810: transport (BP)                                    |
| 73   | 5  | 0.003256 | 0.005328 | GO:0030198: extracellular matrix organization (BP)            |
| 312  | 11 | 0.004021 | 0.006032 | GO:0008283: cell proliferation (BP)                           |
| 106  | 5  | 0.015281 | 0.019647 | GO:0007010: cytoskeleton organization (BP)                    |

NGR=Number of annotated genes in the reference list

NG= Number of annotated genes in the input list

Hyp=Hypergeometric pValue;

Hyp\*= Corrected hypergeometric pValue

Supplemental Table 6. Processes regulated by the putative TR/KLF9 axis target genes: integration of microarray data obtained with KLF9 knockdown (Fig. 2A) and TR/KLF9 dependent targets (Fig. 2C). Analysis was done by GeneCodis using SlimProcess database.

| <b>NGR</b>  | <b>NG</b> | <b>Hyp</b> | <b>Hyp*</b> | <b>Annotations</b>                                            |
|-------------|-----------|------------|-------------|---------------------------------------------------------------|
| <b>1176</b> | 63        | 4.05E-14   | 1.58E-12    | GO:0007165: signal transduction (BP)                          |
| <b>556</b>  | 31        | 5.90E-08   | 1.15E-06    | GO:0007155: cell adhesion (BP)                                |
| <b>242</b>  | 18        | 6.48E-07   | 8.43E-06    | GO:0007267: cell-cell signaling (BP)                          |
| <b>114</b>  | 12        | 1.33E-06   | 1.30E-05    | GO:0007568: aging (BP)                                        |
| <b>519</b>  | 26        | 4.87E-06   | 3.80E-05    | GO:0030154: cell differentiation (BP)                         |
| <b>49</b>   | 7         | 2.99E-05   | 0.00016665  | GO:0006520: cellular amino acid metabolic process (BP)        |
| <b>34</b>   | 5         | 0.000368   | 0.00119456  | GO:0040007: growth (BP)                                       |
| <b>128</b>  | 9         | 0.000616   | 0.00184698  | GO:0009790: embryo development (BP)                           |
| <b>630</b>  | 24        | 0.000711   | 0.00198062  | GO:0055085: transmembrane transport (BP)                      |
| <b>106</b>  | 7         | 0.003463   | 0.00710914  | GO:0007010: cytoskeleton organization (BP)                    |
| <b>604</b>  | 21        | 0.004336   | 0.00845465  | GO:0006810: transport (BP)                                    |
| <b>312</b>  | 13        | 0.005448   | 0.0101169   | GO:0008283: cell proliferation (BP)                           |
| <b>200</b>  | 9         | 0.012029   | 0.0203965   | GO:0034641: cellular nitrogen compound metabolic process (BP) |
| <b>241</b>  | 10        | 0.014178   | 0.0221182   | GO:0006629: lipid metabolic process (BP)                      |
| <b>291</b>  | 11        | 0.019492   | 0.0281563   | GO:0005975: carbohydrate metabolic process (BP)               |
| <b>156</b>  | 7         | 0.025542   | 0.0355767   | GO:0008219: cell death (BP)                                   |



Supplemental Table 7. Differentially expressed genes in the TR/KLF9-mediated pathways (Panther Pathways database) presented in Table 1, lower section.

| <b>Annotations (Panther Pathways)</b>                                            | <b>Gene Symbol</b>                                                                           |
|----------------------------------------------------------------------------------|----------------------------------------------------------------------------------------------|
| <b>P00052: TGF-beta signaling pathway</b>                                        | FOSL1,CITED2,LEFTY1,GDF11,SMAD7,BMP6,FKBP1A,INHBE,JUN                                        |
| <b>P00057: Wnt signaling pathway</b>                                             | DKK1,ACTA2,TLE1,WNT11,TLE6,PRKCE,AXIN2,PRKCZ,PCDHA1,FZD4,CDH6,EDN1,LEF1,KREMEN2,CDH15,ADSSL1 |
| <b>P00006: Apoptosis signaling pathway</b>                                       | PRKCE,DIABLO,TNFRSF10B,BCL2L1,CREM,TNFSF10,BIRC3,JUN,RELB                                    |
| <b>P00003: Alzheimer disease-amyloid secretase pathway</b>                       | CACNB2,PRKCE,PRKCZ,MAPK4,BACE2,PCSK1,PSEN2                                                   |
| <b>P00016: Cytoskeletal regulation by Rho GTPase</b>                             | MYH10,SSH1,ACTA2,TUBB4,RHO,TUBB2B,CFL2,RAC3                                                  |
| <b>P00018: EGF receptor signaling pathway</b>                                    | SPRY4,PRKCE,SFN,PRKCZ,PHLDB2,STAT4,HBEGF,SHC1,RAC3                                           |
| <b>P00004: Alzheimer disease-presenilin pathway</b>                              | ACTA2,WNT11,NOTCH3,JUP,BACE2,FZD4,PCSK1,PSEN2,LEF1                                           |
| <b>P00045: Notch signaling pathway</b>                                           | HEY1,NOTCH3,HES1,PSEN2,HEY2                                                                  |
| <b>P00021: FGF signaling pathway</b>                                             | SPRY4,PRKCE,SFN,PRKCZ,FGF6,PPP2R1B,SHC1,RAC3                                                 |
| <b>P00019: Endothelin signaling pathway</b>                                      | PRKCE,PRKCZ,ECEL1,PCSK1,EDN1,ADCY7                                                           |
| <b>P00036: Interleukin signaling pathway</b>                                     | IL11,MKNK2,STAT4,IL8,IL6,RPS6KA2,SHC1                                                        |
| <b>P00031: Inflammation mediated by chemokine and cytokine signaling pathway</b> | CCL2,MYH10,ACTA2,PRKCE,PRKCZ,CCL5,IL8,SHC1,JUN,RAC3                                          |
| <b>P04393: Ras Pathway</b>                                                       | RPS6KA2,RGL1,SHC1,JUN,RAC3                                                                   |
| <b>P00029:Huntington disease</b>                                                 | ACTA2,CYFIP2,TUBB4,TUBB2B,JUN,RAC3                                                           |
| <b>P00047: PDGF signaling pathway</b>                                            | PDGFRL,MKNK2,STAT4,RPS6KA2,SHC1,JUN                                                          |

Supplemental Table 8. Differentially expressed genes in the TR/KLF9-mediated processes (Slim Process) presented in Supplemental Table 6.

| Annotations                                                          | Gene Symbol                                                                                                                                                                                                                                                                                                                                                                                                                                                       |
|----------------------------------------------------------------------|-------------------------------------------------------------------------------------------------------------------------------------------------------------------------------------------------------------------------------------------------------------------------------------------------------------------------------------------------------------------------------------------------------------------------------------------------------------------|
| <b>GO:0007165: signal transduction (BP)</b>                          | TLE1, CHN1, CDS1, IL7R, WNT11, MFAP4, UNC5A, RARB, TLR3, CLIC3, TNFRSF25, SLC44A2, TNFRSF10B, OCRL, LRRN2, COL15A1, IGF1, CREM, IGFBP1, TNFRSF21, TNFRSF1A, NR2E3, RASD1, INSL4, ABL2, RASL11B, BAIAP2L2, RTKN2, VIPR2, RASSF4, TNFAIP6, ICOSLG, HBEGF, GAS6, IL8, RGL1, FKBP1A, INHA, SFN, MPP2, PRKCE, NR3C1, CHL1, RPS6KA2, PTGES, FGF6, CCL2, ADM, HMOX1, PRKCZ, TNC, MDK, DKK1, INPP5D, ULK1, ARHGAP28, NEDD9, TNFSF10, PDE1C, TNFRSF18, PLAU, RHBDL1, RERGL |
| <b>GO:0007155: cell adhesion (BP)</b>                                | CLDN1, TNFRSF12A, DSC2, PCDHA1, ADAM12, LEF1, MFAP4, F11R, F8, LRRN2, COL15A1, L1CAM, SIRPA, PVRL2, PDZD2, CDH15, THBS1, CDH6, TNFAIP6, MYBPC2, LAMB3, CHL1, PTPRU, CCL2, TNC, HES1, EPHA2, EPHA4, COL9A1, NEDD9, OLR1                                                                                                                                                                                                                                            |
| <b>GO:0007267: cell-cell signaling (BP)</b>                          | GJB2, EDN1, HCN2, IL11, EFNA1, INSL4, NFE2, VIPR2, TNFAIP6, INHA, FGF6, ADM, CRB1, CCL5, PCSK1, SEMA4F, TNFSF10, TSHR                                                                                                                                                                                                                                                                                                                                             |
| <b>GO:0007568: aging (BP)</b>                                        | ALDOC, IL6, DCN, HCN2, NR3C1, CCL2, ADM, JUN, SHC1, CCL5, PTGS1, SERPINF1                                                                                                                                                                                                                                                                                                                                                                                         |
| <b>GO:0030154: cell differentiation (BP)</b>                         | PEG10, ANG, TNFRSF12A, ECSCR, SEMA6B, PAQR8, ARNT, SEMA4B, COL15A1, CREM, SEMA6D, L1CAM, GPM6B, SLIT2, MDGA1, DUSP6, INHA, ZC3H12A, CHL1, FGF6, PTPRU, MDK, TXNDC3, ZSCAN2, SEMA4F, FOXO4                                                                                                                                                                                                                                                                         |
| <b>GO:0006520: cellular amino acid metabolic process (BP)</b>        | SLC7A2, CTH, ACY1, QDPR, AGXT2L1, SDSL, SDS                                                                                                                                                                                                                                                                                                                                                                                                                       |
| <b>GO:0040007: growth (BP)</b>                                       | BCL2L1, BMP6, GDF11, INHBE, VEGFA                                                                                                                                                                                                                                                                                                                                                                                                                                 |
| <b>GO:0009790: embryo development (BP)</b>                           | FOXF1, FOXO1, FOXF2, STOX2, FZD4, FOXO6, PCSK1, FOXO4, PSEN2                                                                                                                                                                                                                                                                                                                                                                                                      |
| <b>GO:0055085: transmembrane transport (BP)</b>                      | SLC39A3, SLC2A12, HCN2, ATP2B4, SLC44A2, SLC7A2, CACNA1H, SLC22A3, SLC27A4, SLC25A42, ADCY7, ATP6V1G2, SLC26A6, ABCB1, SLC16A14, ABCD1, HMOX1, KCNU1, ABCB9, SCN4A, CLCNKA, SLC39A7, SLC16A9, SLC22A18                                                                                                                                                                                                                                                            |
| <b>GO:0007010: cytoskeleton organization (BP)</b>                    | BRWD1, RHOU, PVRL2, ABLIM2, CCL2, NEDD9, DES                                                                                                                                                                                                                                                                                                                                                                                                                      |
| <b>GO:0006810: transport (BP)</b>                                    | GJB2, GABRE, PTGDS, ATP2B4, SLC7A2, CACNA1H, SLC27A4, CETP, STRA6, ABCB1, HBE1, ABCD1, HBA2, STEAP1, SRPR, ABCA13, SLC25A35, FDXR, CLCNKA, MB, CACNB2                                                                                                                                                                                                                                                                                                             |
| <b>GO:0008283: cell proliferation (BP)</b>                           | FES, MYH10, STAT4, UCN2, INSL4, CITED2, INSIG1, GAS6, SFN, FGF6, RAB4B, SERPINF1, CYR61                                                                                                                                                                                                                                                                                                                                                                           |
| <b>GO:0000902: cell morphogenesis (BP)</b>                           | IL7R, BCL6, JUP, SSH1                                                                                                                                                                                                                                                                                                                                                                                                                                             |
| <b>GO:0034641: cellular nitrogen compound metabolic process (BP)</b> | ARG2, SLC7A2, TMLHE, KYNU, QDPR, GPT, HPD, PCSK1, ALDH4A1                                                                                                                                                                                                                                                                                                                                                                                                         |
| <b>GO:0006629: lipid metabolic process (BP)</b>                      | ACSF2, LCN15, PTGDS, OCRL, RBM12, SLC27A4, CETP, PCK1, PTGS1, CEL                                                                                                                                                                                                                                                                                                                                                                                                 |
| <b>GO:0005975: carbohydrate metabolic process (BP)</b>               | ALDOC, PGM2L1, HYAL1, TFF1, PYGM, PFKFB2, PCK1, PPP1R3C, PCK2, PC, PFKFB4                                                                                                                                                                                                                                                                                                                                                                                         |
| <b>GO:0008219: cell death (BP)</b>                                   | ANG, TNFRSF12A, L1CAM, HYAL1, HMOX1, PSEN2, OLR1                                                                                                                                                                                                                                                                                                                                                                                                                  |

Supplemental Table 9. Summary of genes regulated by T3 in KCL034, iKCL004 and BJ cells. Microarray data have been deposited in NCBI's Gene Expression Omnibus (GEO); <http://www.ncbi.nlm.nih.gov/geo/query/acc.cgi?tacc=GSE58273>; accession number GSE58273.

| Cell line | T3-regulated genes |
|-----------|--------------------|
| KCL034    | 820                |
| iKCL004   | 826                |
| BJ        | 0                  |

Supplemental Table 10. Pathway enrichment analysis of T3 dependent transcriptome in KCL034 and iKCL004 cells: Canonical pathways obtained from GeneCodis using Panther Pathways database as described in Table 1.

| Annotations (Panther Pathways)                                                        | KCL034 |          | iKCL004 |          |
|---------------------------------------------------------------------------------------|--------|----------|---------|----------|
|                                                                                       | NG     | Hyp*     | NG      | Hyp*     |
| P00057 Wnt signaling pathway                                                          | 28     | 1.75E-09 | 29      | 1.92E-10 |
| P00005: Angiogenesis                                                                  | 16     | 4.50E-06 | 18      | 1.22E-07 |
| P04374 5HT2 type receptor mediated sign. p.                                           | 12     | 4.23E-07 | 9       | 0.000122 |
| P00019 Endothelin signaling pathway                                                   | 11     | 4.40E-06 | 6       | 0.02040  |
| P00012 Cadherin signaling pathway                                                     | 13     | 9.87E-05 | 19      | 5.81E-09 |
| P00042 Muscarinic acetylcholine receptor 1 and 3 signaling pathway                    | 9      | 3.30E-05 | 8       | 0.00022  |
| P04385 Histamine H1 receptor mediated sign.                                           | 9      | 5.82E-06 | 7       | 0.000202 |
| P00045 Notch signaling pathway                                                        | 6      | 0.000767 | 5       | 0.017203 |
| P00021 FGF signaling pathway                                                          | 9      | 0.003079 | 7       | 0.033244 |
| P00004 Alzheimer disease-presenilin pathway                                           | 9      | 0.004535 | 12      | 0.000104 |
| P00027 Heterotrimeric G-protein signaling pathway-Gq alpha and Go alpha mediated pat. | 9      | 0.003085 | 9       | 0.00317  |
| P00029 Huntington disease                                                             | 8      | 0.021204 | 8       | 0.024924 |
| P00031 Inflammation mediated by chemokine and cytokine signaling pathway              | 10     | 0.032948 | 13      | 0.002324 |
| P00043 Muscarinic acetylcholine receptor 2 and 4 signaling pathway                    | 5      | 0.021579 | 5       | 0.028328 |
| P04391 Oxytocin receptor mediated signaling pathway                                   | 10     | 3.85E-06 | 8       | 0.000216 |
| P04394 Thyrotropin-releasing hormone receptor signaling pathway                       | 10     | 4.56E-06 | 8       | 0.00022  |

NG=Number of annotated genes in the input list  
Hyp\*= Corrected hypergeometric pValue

Supplemental Table 11. List of the differentially expressed genes after T3 treatment in the enriched Notch pathway (Panther Pathways database) in both KCL034 and iKCL004 cells.

| <b>Annotations (Panther Pathways)</b> | <b>Gene Symbol</b>  |
|---------------------------------------|---------------------|
| P00045: Notch signaling pathway       | HES4,HEY2,LFNG,DLK1 |
